# Supplementary material
Source: HighWire-hosted journal article supplement (http://www.cmaj.ca/highwire/filestream/58228/field_highwire_adjunct_files/2/know-clark-3-at_online.pdf)
Supplement: know-clark-3-at_online.pdf [file know-clark-3-at_online.pdf]

**Appendix 3: Primary benefits of health research identified by 101 Members of Parliament and senior aides**

| Benefit                                                                                        | % of times response was mentioned* |
|------------------------------------------------------------------------------------------------|------------------------------------|
| Healthier population, less illness, longer life, better quality of life                        | 70.3                               |
| More efficient health care, savings to health care system                                      | 34.7                               |
| Better health outcomes, reduced suffering                                                      | 23.8                               |
| More productive and prosperous country, reduced economic impact of ill health                  | 15.9                               |
| Ability to cure diseases                                                                       | 14.9                               |
| Prevention of brain drain                                                                      | 12.9                               |
| Higher quality and more effective health care                                                  | 9.9                                |
| A viable health care system in the long term                                                   | 9.9                                |
| New knowledge                                                                                  | 9.9                                |
| Disease prevention                                                                             | 7.9                                |
| Healthier lifestyles                                                                           | 7.9                                |
| Better drugs and technology                                                                    | 6.9                                |
| Improved and equal access to health care                                                       | 6.9                                |
| Commercialization opportunities                                                                | 5.9                                |
| Creation of a culture of innovation                                                            | 5.0                                |
| Improved international reputation, increased opportunities to provide international assistance | 5.0                                |
| More and better jobs                                                                           | 4.0                                |
| Reduced hospital stays, more home care                                                         | 4.0                                |
| Better understanding of health care needs                                                      | 4.0                                |
| Better decision-making, more care options                                                      | 4.0                                |
| National and international knowledge-sharing                                                   | 3.0                                |
| Increased focus on public health issues                                                        | 3.0                                |
| Other†                                                                                         | 10.9                               |

\*Percentages do not add to 100 as multiple responses were allowed.

†“Other” represents 7 unique answers, none mentioned by more than 2 respondents.
